# Supplementary material
Source: Royal Society of Chemistry journal article supplement (doi:10.1039/d6nj00922k)

## Upcycling Plastic Waste and Coconut Shell into Highly Efficient Adsorbents for Groundwater Decontamination of As(III) and Plant Growth Studies

Manisha Bhardwaj<sup>a</sup>, Sonia Saini<sup>b</sup>, Agrima Singh<sup>a</sup>, Nirmala Kumari Jangid<sup>a</sup>,  
Shruti Shukla<sup>a</sup>, Sapana Jadoun<sup>c\*</sup>, Jaya Dwivedi<sup>a\*</sup>, Swapnil Sharma<sup>d</sup>

<sup>a</sup>Department of Chemistry, Banasthali Vidyapith, Banasthali, India

<sup>b</sup>School of Earth Sciences, Banasthali Vidyapith, Banasthali, India

[manishabhardwaj0220@gmail.com](mailto:manishabhardwaj0220@gmail.com)

[sonisaini316@gmail.com](mailto:sonisaini316@gmail.com)

[agrimasingh18@gmail.com](mailto:agrimasingh18@gmail.com)

[nirmalakumari@banasthali.in](mailto:nirmalakumari@banasthali.in)

[shruti@banasthali.in](mailto:shruti@banasthali.in)

[jayadwivedi@banasthali.in](mailto:jayadwivedi@banasthali.in)

<sup>c</sup>Sol-ARIS, Departamento de Química, Facultad de Ciencias,  
Universidad de Tarapacá, Avda. General Velásquez, 1775, Arica,  
Chile

[sjadoun@academicos.uta.cl](mailto:sjadoun@academicos.uta.cl)

<sup>d</sup>Department of Pharmacy, Banasthali Vidyapith, Banasthali, India

[sswapnil@banasthali.in](mailto:sswapnil@banasthali.in)

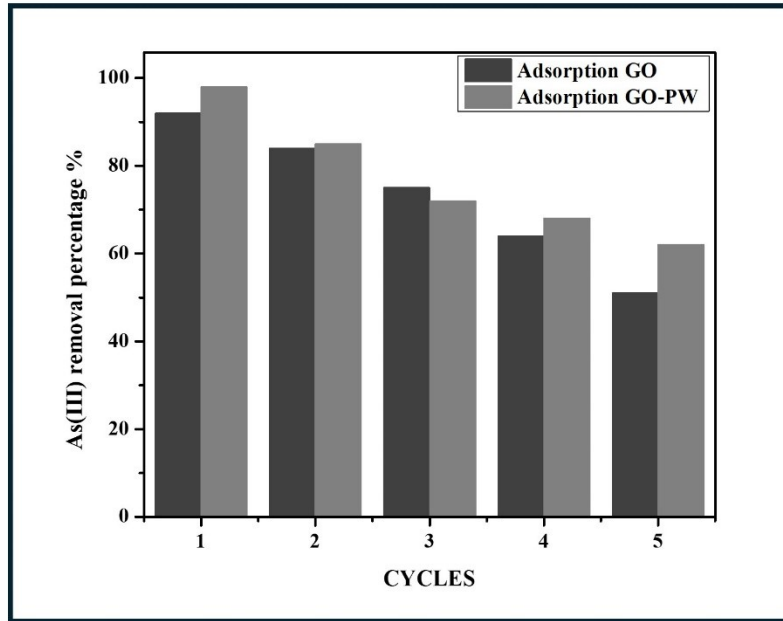

**Fig S1.** Recyclability study of GO and GO-PW

**Table S1.** Kinetic model parameters: a) pseudo-order, b) pseudo-second order

| <b>a) 1<sup>st</sup> order kinetics</b> |                  |                      |           |           |                      |
|-----------------------------------------|------------------|----------------------|-----------|-----------|----------------------|
| <b>Metal Ion</b>                        | <b>Intercept</b> | <b>R<sup>2</sup></b> | <b>qe</b> | <b>K1</b> | <b>R<sup>2</sup></b> |
| As(III)                                 | 0.80987          | 0.98                 | 6.45461   | -0.00014  | 0.98                 |

| <b>b) 2<sup>nd</sup> order kinetics</b> |                  |                      |           |           |                      |
|-----------------------------------------|------------------|----------------------|-----------|-----------|----------------------|
| <b>Metal Ion</b>                        | <b>Intercept</b> | <b>R<sup>2</sup></b> | <b>qe</b> | <b>K2</b> | <b>R<sup>2</sup></b> |
| As(III)                                 | 4.6809           | 0.998                | 3.210067  | 2.201399  | 0.998                |

**Table S2.** Adsorption isotherm models and their parameter values

| <b>Metal Ion</b> | <b>Langmuir Model</b> | <b>Freundlich Model</b> |
|------------------|-----------------------|-------------------------|
|                  |                       |                         |

|         | <b>Adsorbent</b> | <b>q<sub>max</sub><br/>(mg/g)</b> | <b>R<sup>2</sup></b> | <b>k<sub>f</sub></b> | <b>1/n</b> | <b>R<sup>2</sup></b> |
|---------|------------------|-----------------------------------|----------------------|----------------------|------------|----------------------|
| As(III) | GO               | 195.3                             | 0.953                | 4.986                | 0.14       | 0.949                |
|         | GO-PW            | 274.7                             | 0.983                | 5.028                | 0.20       | 0.951                |

**Table S3.** Thermodynamic parameters of adsorption of As(III) by GO-PW

| <b>T(K)</b> | <b>ln K<sub>L</sub></b> | <b>ΔG°<br/>(kJ/mol)</b> | <b>ΔH°<br/>(kJ/mol)</b> | <b>ΔS°<br/>(kJ/mol)</b> |
|-------------|-------------------------|-------------------------|-------------------------|-------------------------|
| 298         | 124.50                  | -310.50                 | -0.0029                 | 0.052                   |
| 308         | 128.90                  | -330.75                 |                         |                         |
| 318         | 133.20                  | -350.90                 |                         |                         |

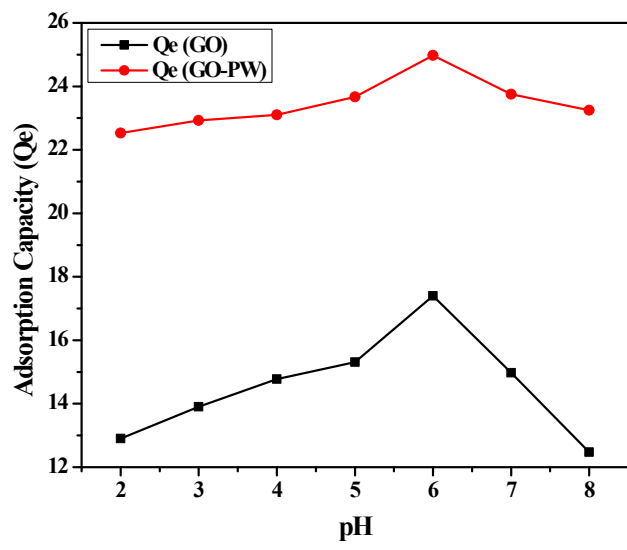

Supplement: d6nj00922k1.pdf [file d6nj00922k1.pdf]
